# Supplementary material
Source: Springer Nature journal article supplement (https://www.springermedizin.de/resource/supplementary/12990_2009_231_MOESM8_ESM.pdf/9612846)

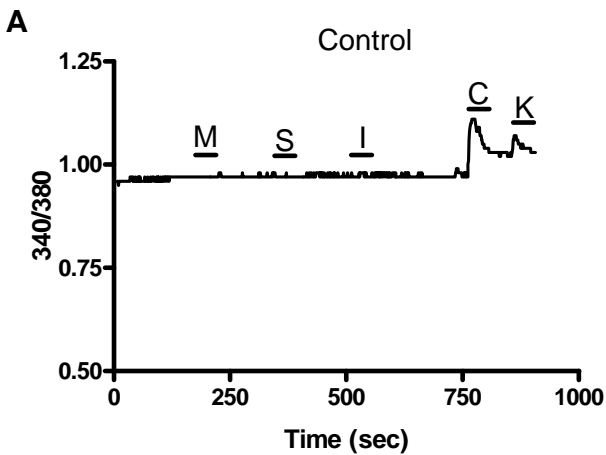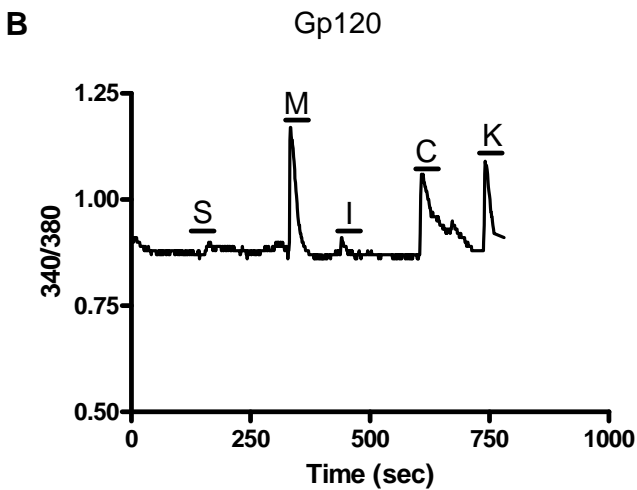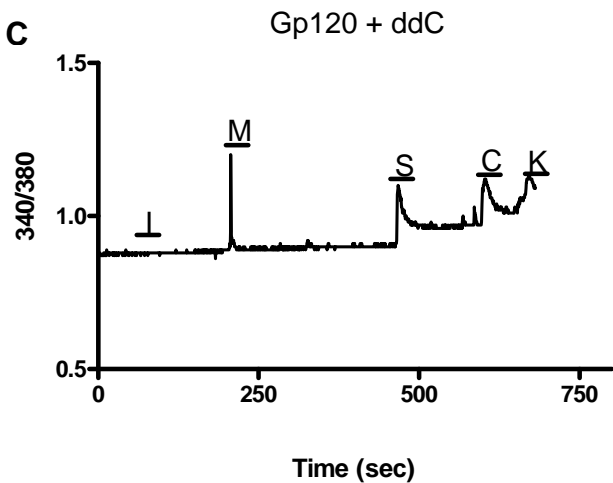

Supplement: MOESM8 [file 9612846]
